# Supplementary material for: Nab-paclitaxel plus tegafur gimeracil oteracil potassium capsule (S-1) as first-line treatment for advanced biliary tract adenocarcinoma: a phase 2 clinical trial
Source: PubMed Central journal article supplement — Hepatobiliary Surg Nutr. 2021 Oct 18;12(1):37–44. doi: 10.21037/hbsn-21-172 (PMC9944545; doi:10.21037/hbsn-21-172), 2021-10-18
Supplement: hbsn-12-01-37-dss.pdf [file hbsn-12-01-37-dss.pdf]

## Data Sharing Statement

|                     |                                                                                                                                                     |                                                                                                                  |
|---------------------|-----------------------------------------------------------------------------------------------------------------------------------------------------|------------------------------------------------------------------------------------------------------------------|
| <b>Article Info</b> | <a href="https://dx.doi.org/10.21037/hbsn-21-172">https://dx.doi.org/10.21037/hbsn-21-172</a>                                                       |                                                                                                                  |
| <b>Item</b>         | <b>Question</b>                                                                                                                                     | <b>Authors' Response<br/>(place "-" if not applicable)</b>                                                       |
| 1                   | Would you like to share data collected for your study to others?                                                                                    | Yes.                                                                                                             |
| 2                   | If not, would you like to share the reason for your decision?                                                                                       |                                                                                                                  |
| 3                   | What data in particular will be shared?                                                                                                             | The survival data in particular will be shared.                                                                  |
| 4                   | Any other documents will be shared? Such as study protocol, statistical analysis plan, informed consent form, clinical study report, analytic code. | Statistical analysis plan and informed consent form will also be shared if requested.                            |
| 5                   | When will data availability begin?                                                                                                                  | From the publication date.                                                                                       |
| 6                   | When will data availability end?                                                                                                                    | Two years within the publication date, since the technique or survival date may be updated over time.            |
| 7                   | To whom will you share the data?                                                                                                                    | Medical oncologists and surgeons who are interested in this studies.                                             |
| 8                   | For what type of analysis or purpose?                                                                                                               | To analyze and evaluate the efficacy of drugs in the treatment of biliary tract adenocarcinoma.                  |
| 9                   | How or where can the data/documents be obtained?                                                                                                    | Emails could be sent to the address below to obtain the shared data:<br>wenwen0605@163.com.                      |
| 10                  | Any other restrictions?                                                                                                                             | We may balance the potential benefits and risks for each request and then provide the data that could be shared. |
